# Supplementary material for: Investigating Diesel Engines as an Atmospheric Source of Isocyanic Acid in Urban Areas
Source: Copernicus journal article supplement (doi:10.5194/acp-2017-52), 2017-02-22
Supplement: Supplementary file 1 [file acp-2017-52-supplement.pdf]

# Supporting Information for Investigating Diesel Engines as an Atmospheric Source of Isocyanic Acid in Urban Areas

Shantanu H. Jathar<sup>1</sup>, Christopher Heppding<sup>1</sup>, Michael F. Link<sup>2</sup>, Delphine K. Farmer<sup>2</sup>, Ali Akherati<sup>1</sup>, Michael J. Kleeman<sup>3</sup>, Joost A. de Gouw<sup>4,5</sup>, Patrick R. Veres<sup>4,5</sup>, and James M. Roberts<sup>4</sup>

- 5 <sup>1</sup> Department of Mechanical Engineering, Colorado State University, Fort Collins, CO, USA, 80523  
<sup>2</sup> Department of Chemistry, Colorado State University, Fort Collins, CO, USA, 80523  
<sup>3</sup> Department of Civil and Environmental Engineering, University of California Davis, Davis, CA, USA, 95616  
<sup>4</sup> NOAA Earth System Research Laboratory, Chemical Sciences Division, Boulder, CO, USA, 80305  
<sup>5</sup> Cooperative Institute for Research in Environmental Sciences, University of Colorado, Boulder, CO, USA, 80305

10 Correspondence to: Shantanu H. Jathar (shantanu.jathar@colostate.edu)

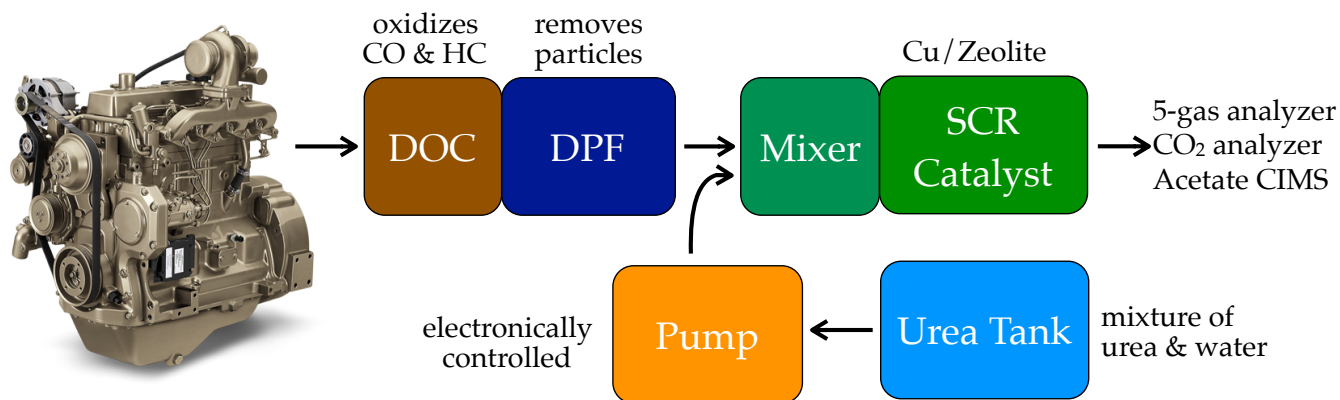

Figure S-1: Schematic showing the diesel engine, selective catalytic reduction (SCR) system, and instrumentation used during the study.

Table S-1: HNCO and CO emission factors and HNCO:CO ratios used to determine lower and upper bound for the ratios

| Reference/Engine                           | Engine Mode/Drive Cycle | HNCO (mg kg-fuel <sup>-1</sup> ) | CO (g kg-fuel <sup>-1</sup> ) | HNCO/CO  |
|--------------------------------------------|-------------------------|----------------------------------|-------------------------------|----------|
| This work: John Deere 4.5L Tier-3/Tier-4   | 1500 rpm @ 45 kW        | 38.80                            | 4.61                          | 8.41E-03 |
|                                            | 2400 rpm @ 11 kW        | 56.20                            | 48.91                         | 1.15E-03 |
|                                            | 2400 rpm @ 57 kW        | 30.90                            | 3.74                          | 8.26E-03 |
|                                            | 1500 rpm @ 45 kW        | 9.40                             | 2.19                          | 4.29E-03 |
|                                            | 2400 rpm @ 57 kW        | 7.60                             | 3.40                          | 2.24E-03 |
| Link et al. (2016): John Deere 4.5L Tier-3 | 900 rpm @ 0 kW          | 54.00                            | 49.00                         | 1.10E-03 |
|                                            | 2400 rpm @ 60 kW        | 17.00                            | 3.95                          | 4.30E-03 |
|                                            | 900 rpm @ 0 kW          | 51.00                            | 54.00                         | 9.44E-04 |
|                                            | 2400 rpm @ 60 kW        | 17.00                            | 3.65                          | 4.66E-03 |
| Wentzell et al. (2013): VW                 | US06                    | 3.98                             | 0.92                          | 4.33E-03 |

|                                                                  |                  |       |       |          |
|------------------------------------------------------------------|------------------|-------|-------|----------|
| Jetta 2001 + DOC                                                 | HWFET            | 3.54  | 1.01  | 3.50E-03 |
|                                                                  | FTP75            | 0.21  | 11.60 | 1.77E-05 |
|                                                                  | Idle             | 0.61  | 7.09  | 8.62E-05 |
| Heeb et al. (2011, 2012):<br>IVECO 3L Euro-3 engine              | ISO8178 – Mode 7 | 4.58  | 5.19  | 8.82E-04 |
|                                                                  | ISO8178 – Mode 4 | 7.50  | 15.86 | 4.73E-04 |
|                                                                  | ISO8178 – Mode 3 | 2.38  | 2.01  | 1.18E-03 |
| Heeb et al. (2011, 2012):<br>IVECO 3L Euro-3 engine<br>(SCR)     | ISO8178 – Mode 7 | 12.50 | 4.10  | 3.05E-03 |
|                                                                  | ISO8178 – Mode 4 | 32.41 | 19.03 | 1.70E-03 |
|                                                                  | ISO8178 – Mode 3 | 41.26 | 2.60  | 1.59E-02 |
| Heeb et al. (2011, 2012):<br>IVECO 3L Euro-3 engine<br>(DPF+SCR) | ISO8178 – Mode 7 | 1.64  | BDL   | NA       |
|                                                                  | ISO8178 – Mode 4 | 45.17 | 3.40  | 1.33E-02 |
|                                                                  | ISO8178 – Mode 3 | 74.88 | BDL   | NA       |

BDL = below detection limit, NA = not applicable

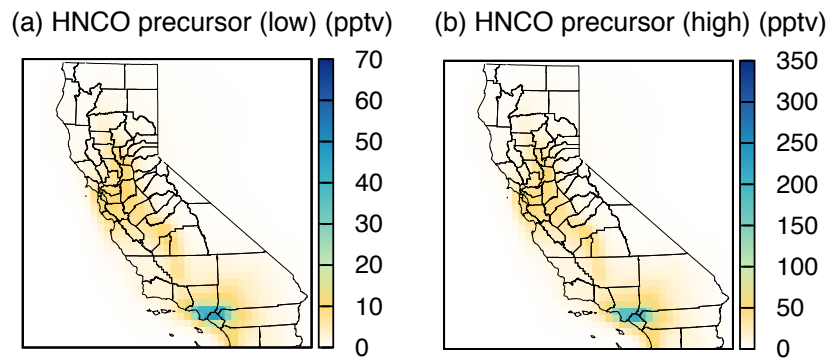

Figure S-2: (a) Low and (b) high estimates of the 14-day averaged ground-level concentrations of HNCO precursors from the 24 km simulations.
